# Supplementary material for: Nitrogen- and oxygen-containing micro–mesoporous carbon microspheres derived from m-aminophenol formaldehyde resin for supercapacitors with high rate performance
Source: Royal Society of Chemistry journal article supplement (doi:10.1039/c6ra16608c), 2016-01-01
Supplement: c6ra16608c1.pdf [file c6ra16608c1.pdf]

## Electronic Supplementary Information

### Nitrogen- and oxygen-containing micro-mesoporous carbon microspheres derived from *m*-aminophenol formaldehyde resin for supercapacitor with high rate performance

Siping Liu,<sup>a</sup> Xiujuan Chen,<sup>a,b</sup> Xiaoli Li,<sup>c</sup> Pengfei Huo,<sup>a</sup> Yiqun Wang,<sup>a</sup> Long Bai,<sup>a</sup> Wen Zhang,<sup>a</sup>  
Maocheng Niu<sup>a</sup> and Zhiguo Li<sup>a,\*</sup>

<sup>a</sup> Key Laboratory of Bio-based Material Science and Technology (Ministry of Education), College  
of Materials Science and Engineering, Northeast Forestry University, Harbin, Heilongjiang,  
150040, China.

<sup>b</sup> Benjamin M. Statler College of Engineering and Mineral Resources, West Virginia University,  
Morgantown, WV 26506-6102, USA.

<sup>c</sup> Heilongjiang Key Laboratory of Molecular Design and Preparation of Flame Retarded Materials,  
College of Science, Northeast Forestry University, Harbin, Heilongjiang, 150040, China.

\* Corresponding author. *E-mail address*: lizgmse@nefu.edu.cn (Z. Li).

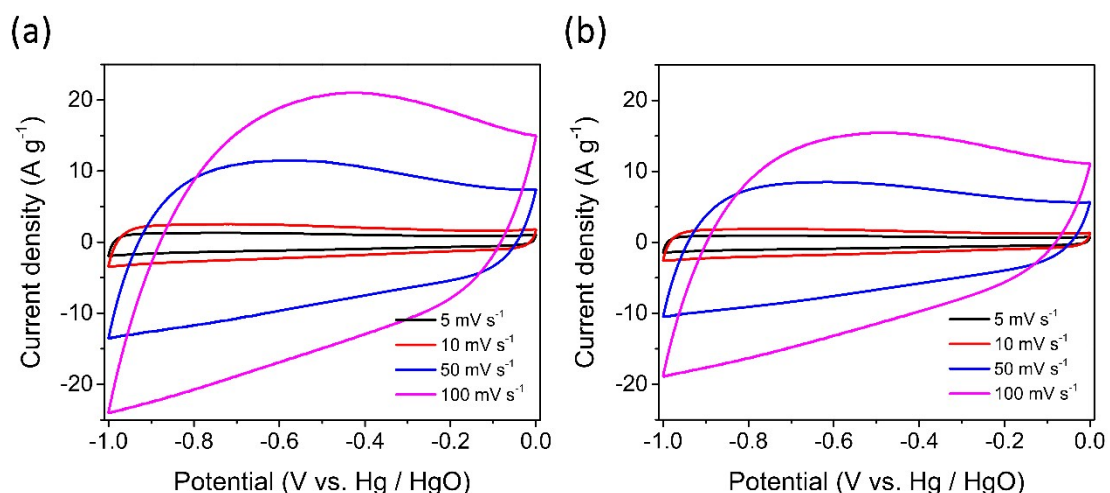

Fig. S1 CV curves of NO-MMCMs-700 (a) and NO-MMCMs-850 (b) at different scan rates ranging  
from 5 to 100 mV s<sup>-1</sup>.

Table S1 Relative percentage of nitrogen and oxygen species obtained from deconvoluted XPS spectra

| Peak  | Assignment            | Fraction of species (%) |              |              |
|-------|-----------------------|-------------------------|--------------|--------------|
|       |                       | NO-MMCMs-600            | NO-MMCMs-700 | NO-MMCMs-850 |
| O1s   |                       |                         |              |              |
| O-I   | C=O                   | 25.71                   | 37.52        | 47.77        |
| O-II  | C-OH/C-O-C            | 35.77                   | 34.32        | 25.89        |
| O-III | O-C=O                 | 22.20                   | 21.17        | 17.96        |
| O-IV  | chemisorbed O         | 16.32                   | 6.99         | 8.38         |
| N1s   |                       |                         |              |              |
| N-6   | pyridinic N           | 32.00                   | 9.59         | 28.03        |
| N-5   | pyrrolic-/pyridonic-N | 44.67                   | 45.50        | 41.72        |
| N-Q   | quaternary-N          | 14.98                   | 18.10        | 13.30        |
| N-X   | pyridine-N-oxide      | 8.35                    | 31.61        | 18.63        |
